# Supplementary material for: Scrambled eggs: A highly sensitive molecular diagnostic workflow for Fasciola species specific detection from faecal samples
Source: PLOS journal article supplement (doi:10.1371/journal.pntd.0005931), 2017-09-15
Supplement: S8 (10.1371/journal.pntd.0005931.s008) [file journal.pntd.0005931.s008]

Supporting Figure 3. Storage condition has no impact on the positive/negative *F. hepatica* corpoELISA outcome

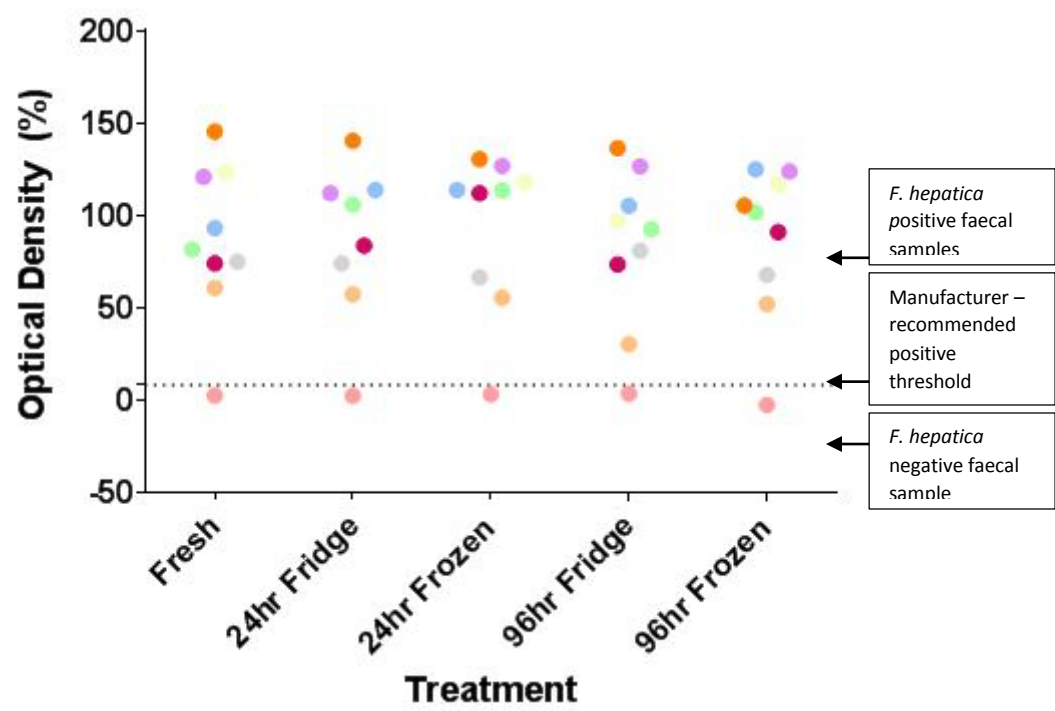

Colours indicate individual faecal samples subjected to five different storage conditions
